# Supplementary material for: State-dependent reward circuit modulation gates social buffering of stress
Source: Research Square preprint supplement (doi:10.21203/rs.3.rs-9441690/v1), 2026-05-21
Supplement: Supplementary file 1 [file d6ec033e6e783731eddac95a.pdf]

| Fig.                     | Figure experiment                                                                                                                      | Number of animals per group (F-females, M-males) | Is data distribution normal? (Shapiro-Wilk test, alpha=0.05)         | Analysis                        | Analysis results (post-hoc results reported in figures)                                                                                                                                                                   | P value                                                                                               |
|--------------------------|----------------------------------------------------------------------------------------------------------------------------------------|--------------------------------------------------|----------------------------------------------------------------------|---------------------------------|---------------------------------------------------------------------------------------------------------------------------------------------------------------------------------------------------------------------------|-------------------------------------------------------------------------------------------------------|
| <b>Ext.Data Figure 1</b> |                                                                                                                                        |                                                  |                                                                      |                                 |                                                                                                                                                                                                                           |                                                                                                       |
| Ext.Data 1a              | Effects of interaction with a familiar partner on stress-induced increase in latency to retrieve rewards- raw data analysis            | n=13-16<br>F=7-9<br>M=6-9                        | control: no<br>control SI: no<br>restraint: no<br>restraint SI: no   | Wilcoxon test                   | control<br>control SI<br>restraint<br>restraint SI                                                                                                                                                                        | P=0.9032<br>P=0.3396<br><b>P=0.0004</b><br>P=0.8603                                                   |
|                          | Effects of interaction with a familiar partner on stress-induced decrease in anticipatory licks to retrieve rewards- raw data analysis |                                                  | control: no<br>control SI: yes<br>restraint: yes<br>restraint SI: no | Wilcoxon test or paired t-test  | control<br>control SI<br>restraint<br>restraint SI                                                                                                                                                                        | P=0.7869<br>P=0.1524<br><b>P=0.0008</b><br>P=0.7436                                                   |
| Ext.Data 1b              | ROC curves AUC for latency and anticipatory licks                                                                                      | n=43<br>F=18<br>M=25                             | n/a                                                                  | Bootstrap comparison            | Mean AUC diff: 0.1567<br>95% CI: [0.0605, 0.2561]                                                                                                                                                                         | P=0.0010                                                                                              |
| Ext.Data 1c              | Sex differences in the effects of SI with a familiar partner on stress-induced increase in latency to retrieve rewards.                | n=13-16<br>F=7-9<br>M=6-9                        | yes                                                                  | 3-way ANOVA (sex x stress x SI) | Sex: F (1, 50) = 1.056<br>Stress: F (1, 50) = 13.95<br>SI: F (1, 50) = 9.415<br>Sex x Stress: F (1, 50) = 2.540<br>Sex x SI: F (1, 50) = 0.03531<br>Stress x SI: F (1, 50) = 7.263<br>Sex x Stress x SI: F(1, 50) = 1.153 | P=0.3091<br><b>P=0.0005</b><br><b>P=0.0035</b><br>P=0.1173<br>P=0.8517<br><b>P=0.0096</b><br>P=0.2881 |
| Ext.Data 1d              | Effects of stress and SI on self-grooming.                                                                                             | n=13-16<br>F=7-9<br>M=6-9                        | yes                                                                  | 2-way ANOVA (stress x SI)       | Stress x SI: F (1, 54) = 3.400<br>stress: F (1, 54) = 88.73<br>SI: F (1, 54) = 6.145                                                                                                                                      | P=0.0707<br><b>p&lt;0.0001</b><br><b>P=0.0163</b>                                                     |
| Ext.Data 1e              | Effects of restraint on body sniffing in subject and partner mice.                                                                     | n=13-16<br>F=7-9<br>M=6-9                        | yes                                                                  | one way ANOVA                   | F (3, 55) = 8.881                                                                                                                                                                                                         | <b>P&lt;0.0001</b>                                                                                    |
|                          | Effects of restraint on anogenital sniffing in subject and partner mice.                                                               |                                                  | no                                                                   | Kruskal-Wallis test             | Kruskal-Wallis statistic = 35.82                                                                                                                                                                                          | <b>P&lt;0.0001</b>                                                                                    |
| Ext.Data 1f              | Familiar object habituation                                                                                                            | n=15<br>F=6<br>M=9                               | yes                                                                  | Mixed effects model (REML)      | F (1.818, 24.24) = 34.11                                                                                                                                                                                                  | <b>P&lt;0.0001</b>                                                                                    |
| Ext.Data 1g              | Effects of interaction with a familiar object on stress-induced increase in latency to retrieve rewards- raw data analysis             | n=15<br>F=6<br>M=9                               | no                                                                   | Friedman test                   | Freidman statistic = 16.76                                                                                                                                                                                                | <b>P=0.0008</b>                                                                                       |
| Ext.Data 1h              | Effects of interaction with a familiar object on anticipatory licks                                                                    | n=15<br>F=6<br>M=9                               | yes                                                                  | Mixed effects model (REML)      | F (1.354, 18.96) = 1.140                                                                                                                                                                                                  | P=0.3191                                                                                              |
| Ext.Data 1i              | Effects of interaction with a novel partner on stress-induced increase in latency to retrieve rewards- raw data analysis               | n=13<br>F=6<br>M=7                               | no                                                                   | Friedman test                   | Freidman statistic = 11.95                                                                                                                                                                                                | <b>P=0.0075</b>                                                                                       |
| Ext.Data 1j              | Effects of interaction with a novel partner on anticipatory licks                                                                      | n=13<br>F=6<br>M=7                               | yes                                                                  | Mixed effects model (REML)      | F (1.981, 23.77) = 0.3447                                                                                                                                                                                                 | P=0.7099                                                                                              |
| Ext.Data 1l              | Linear regression between body sniffing behavior in stressed subjects interacting with familiar unstressed partners.                   | n=16<br>F=8<br>M=8                               | n/a                                                                  | Linear regression               | R square = 0.3839<br>Slope: F (1, 14) = 8.725                                                                                                                                                                             | <b>P=0.0105</b>                                                                                       |
| Ext.Data 1m              | Linear regression between body sniffing behavior in unstressed partners interacting with familiar stressed subjects.                   | n=16<br>F=8<br>M=8                               | n/a                                                                  | Linear regression               | R square = 0.01397<br>Slope: F (1, 14) = 0.1984                                                                                                                                                                           | P=0.6628                                                                                              |
| Ext.Data 1n              | Linear regression between body sniffing behavior in stressed subjects interacting with novel unstressed partners.                      | n=13<br>F=6<br>M=7                               | n/a                                                                  | Linear regression               | R square = 0.02211<br>Slope: F (1, 11) = 0.2487                                                                                                                                                                           | P=0.6278                                                                                              |
| Ext.Data 1o              | Linear regression between body sniffing behavior in unstressed partners interacting with novel stressed subjects.                      | n=13<br>F=6<br>M=7                               | n/a                                                                  | Linear regression               | R square = 0.04219<br>Slope: F (1, 11) = 0.4845                                                                                                                                                                           | P=0.5008                                                                                              |
| <b>Ext.Data Figure 2</b> |                                                                                                                                        |                                                  |                                                                      |                                 |                                                                                                                                                                                                                           |                                                                                                       |
| Ext.Data 2a              | Effects of interaction with a familiar partner on stress-induced increase in latency to retrieve rewards- raw data analysis            | n=16<br>F=8<br>M=8                               | no                                                                   | Friedman test                   | Freidman statistic = 16.20                                                                                                                                                                                                | <b>P=0.0010</b>                                                                                       |
| Ext.Data 2b              | Linear regression between body sniffing behavior in unstressed partners interacting with familiar stressed subjects.                   | n=16<br>F=8<br>M=8                               | n/a                                                                  | Linear regression               | R square = 0.0312<br>Slope: F (1, 14) = 0.4514                                                                                                                                                                            | P=0.5126                                                                                              |
|                          | Area under curve (AUC) during body sniffing                                                                                            | control SI n=128 events                          |                                                                      | Mann-Whitney test               | U (15406, 15470) = 7150                                                                                                                                                                                                   | P=0.3483                                                                                              |

|             |                                                                                                                                 |                                                                    |    |                                                              |                                              |                                          |
|-------------|---------------------------------------------------------------------------------------------------------------------------------|--------------------------------------------------------------------|----|--------------------------------------------------------------|----------------------------------------------|------------------------------------------|
| Ext.Data 2c | towards familiar partner in control SI and restraint SI conditions in DA cells                                                  | control SI n=120 events<br>restraint SI n=120 events               | no | One sample Wilcoxon test vs baseline                         | control SI<br>restraint SI                   | <b>P=0.0173</b><br><b>P&lt;0.0001</b>    |
| Ext.Data 2d | AUC during body sniffing towards familiar partner in control SI and restraint SI conditions in GABA cells                       | control SI n=147 events<br>restraint SI n=145 events               | no | Mann-Whitney test                                            | U (23464, 19314) = 8729                      | <b>P=0.0075</b>                          |
|             |                                                                                                                                 |                                                                    |    | One sample Wilcoxon test vs baseline                         | control SI<br>restraint SI                   | P=0.7293<br><b>P&lt;0.0001</b>           |
| Ext.Data 2e | Body sniff duration during Ca <sup>2+</sup> downregulated and upregulated events in DA neurons                                  | control SI down n=58<br>up=70<br>restraint SI down n=45 up<br>n=75 | no | Mann-Whitney test                                            | control SI z=-2.786<br>restraint SI z=-3.779 | <b>P=0.0053</b><br><b>P=0.002</b>        |
|             |                                                                                                                                 |                                                                    |    | n=7<br>F=3<br>M=4                                            | yes                                          | Paired t-test                            |
| Ext.Data 2f | Body sniff duration during Ca <sup>2+</sup> downregulated and upregulated events in GABA neurons                                | control SI down n=72<br>up=75<br>restraint SI down n=94 up<br>n=51 | no | Mann-Whitney test                                            | control SI z=0.692<br>restraint SI z=3.176   | P=0.4891<br><b>P=0.0015</b>              |
|             |                                                                                                                                 |                                                                    |    | n=9<br>F=5<br>M=4                                            | yes                                          | Paired t-test                            |
| Ext.Data 2g | AUC while being subjected to body sniffing from familiar partner in control SI and restraint SI conditions in DA cells          | control SI n=145 events<br>restraint SI n=175 events               | no | Mann-Whitney test                                            | U (20136, 27759) = 10266                     | P=0.0555                                 |
|             |                                                                                                                                 |                                                                    |    | n=7<br>F=3<br>M=4                                            | yes                                          | Paired t-test                            |
| Ext.Data 2h | AUC while being subjected to body sniffing from familiar partner in control SI and restraint SI conditions in GABA cells        | control SI n=158 events<br>restraint SI n=210 events               | no | Mann-Whitney test                                            | U (26962, 31691) = 14401                     | P=0.8827                                 |
|             |                                                                                                                                 |                                                                    |    | n=9<br>F=5<br>M=4                                            | yes                                          | Paired t-test                            |
| Ext.Data 2i | AUC during anogenital sniffing towards familiar partner in control SI and restraint SI conditions in DA cells                   | control SI n=49 events<br>restraint SI n=16 events                 | no | Mann-Whitney test                                            | U (1593, 552) = 368                          | P=0.7231                                 |
|             |                                                                                                                                 |                                                                    |    | n=5 (2 mice no events in restraint SI session)<br>F=2<br>M=3 | yes                                          | Paired t-test                            |
| Ext.Data 2j | AUC during anogenital sniffing towards familiar partner in control SI and restraint SI conditions in GABA cells                 | control SI n=53 events<br>restraint SI n=22 events                 | no | Mann-Whitney test                                            | U (1973, 877) = 542                          | P=0.6398                                 |
|             |                                                                                                                                 |                                                                    |    | n=7 (2 mice no events in restraint SI session)<br>F=4<br>M=3 | yes                                          | Paired t-test                            |
| Ext.Data 2k | AUC while being subjected to ano-genital sniffing from familiar partner in control SI and restraint SI conditions in DA cells   | control SI n=22 events<br>restraint SI n=53 events                 | no | Mann-Whitney test                                            | U (780, 2070) = 527                          | P=0.5212                                 |
|             |                                                                                                                                 |                                                                    |    | n=5 (2 mice no events in control SI session)<br>F=2<br>M=3   | no                                           | Wilcoxon test                            |
| Ext.Data 2l | AUC while being subjected to ano-genital sniffing from familiar partner in control SI and restraint SI conditions in GABA cells | control SI n=23 events<br>restraint SI n=74 events                 | no | Mann-Whitney test                                            | U (1215, 3538) = 763                         | P=0.4606                                 |
|             |                                                                                                                                 |                                                                    |    | n=8 (1 mouse no events in control SI session)<br>F=4<br>M=4  | no                                           | Wilcoxon test                            |
| Ext.Data 2m | AUC during body sniffing towards novel partner in control SI and restraint SI conditions in DA cells                            | control SI n=128 events<br>restraint SI n=120 events               | no | Mann-Whitney test                                            | U (18978, 8283) = 5508                       | P=0.4352                                 |
|             |                                                                                                                                 |                                                                    |    | One sample Wilcoxon test vs baseline                         | control SI<br>restraint SI                   | <b>P&lt;0.0001</b><br><b>P=0.0006</b>    |
| Ext.Data 2n | AUC during body sniffing towards novel partner in control SI and restraint SI conditions in GABA cells                          | control SI n=147 events<br>restraint SI n=145 events               | no | Mann-Whitney test                                            | U (25657, 16829) = 9689                      | P=0.4404                                 |
|             |                                                                                                                                 |                                                                    |    | One sample Wilcoxon test vs baseline                         | control SI<br>restraint SI                   | <b>P&lt;0.0001</b><br><b>P&lt;0.0001</b> |

Ext.Data Figure 3

|             |                                                                                                             |                    |     |                            |                            |                    |
|-------------|-------------------------------------------------------------------------------------------------------------|--------------------|-----|----------------------------|----------------------------|--------------------|
| Ext.Data 3a | Effects of VTA DA activation on stress-induced increase in latency to retrieve rewards- raw data analysis   | n=14<br>F=6<br>M=8 | no  | Friedman test              | Freidman statistic = 13.46 | <b>P=0.0037</b>    |
| Ext.Data 3b | Effects of VTA GABA inhibition on stress-induced increase in latency to retrieve rewards- raw data analysis | n=13<br>F=4<br>M=9 | yes | Mixed effects model (REML) | F (2.264, 27.17) = 14.69   | <b>P&lt;0.0001</b> |
| Ext.Data 3c | Effects of VTA DA activation on self-grooming                                                               | n=14<br>F=6<br>M=8 | yes | Mixed effects model (REML) | F (1, 11) = 13.90          | <b>P=0.0033</b>    |
|             | Effects of VTA DA activation on walking                                                                     | M=8                | no  | Friedman test              | Freidman statistic = 19.97 | <b>P&lt;0.0001</b> |
|             | Effects of VTA DA activation on sitting                                                                     |                    | no  | Friedman test              | Freidman statistic = 16.20 | <b>P=0.0010</b>    |
| Ext.Data 3d | Effects of VTA GABA inhibition on self-grooming                                                             | n=13<br>F=4<br>M=9 | yes | Mixed effects model (REML) | F (1.000, 12.00) = 19.64   | <b>P=0.0008</b>    |
|             | Effects of VTA GABA inhibition on walking                                                                   |                    | no  | Friedman test              | Freidman statistic = 25.56 | <b>P&lt;0.0001</b> |
|             | Effects of VTA GABA inhibition on sitting                                                                   |                    | no  | Friedman test              | Freidman statistic = 11.98 | <b>P=0.0075</b>    |
| Ext.Data 3e | Head exploration in body sniff behavior                                                                     | n=16<br>F=8<br>M=8 | yes | Paired t-test              | t=1.340, df=15             | P=0.2003           |
| Ext.Data 3f | Effect of closed-loop VTA GABA inhibition on stress-induced latency to retrieve rewards-raw data            | n=14<br>F=6<br>M=8 | no  | Friedman test              | Freidman statistic = 13.86 | <b>P=0.0010</b>    |
| Ext.Data 3g | Effects of closed loop VTA GABA inhibition on self-grooming                                                 | n=13<br>F=4<br>M=9 | no  | Wilcoxon test              |                            | P=0.1937           |
|             | Effects of closed loop VTA GABA inhibition on walking                                                       |                    | no  | Wilcoxon test              |                            | P=0.7609           |
|             | Effects of closed loop VTA GABA inhibition on sitting                                                       |                    | no  | Wilcoxon test              |                            | P=0.6698           |
|             | Effects of closed loop VTA GABA inhibition on body exploration                                              |                    | no  | Wilcoxon test              |                            | P=0.2412           |
| Ext.Data 3h | Effect of yoked VTA GABA inhibition on stress-induced latency to retrieve rewards- raw data                 | n=14<br>F=6<br>M=8 | no  | Friedman test              | Freidman statistic = 17.71 | <b>P=0.0001</b>    |
| Ext.Data 3i | Effects of yoked VTA GABA inhibition on self-grooming                                                       | n=13<br>F=4<br>M=9 | yes | Paired t-test              | t=0.4726, df=13            | P=0.6443           |
|             | Effects of yoked VTA GABA inhibition on walking                                                             |                    | yes | Paired t-test              | t=1.705, df=13             | P=0.1120           |
|             | Effects of yoked VTA GABA inhibition on sitting                                                             |                    | no  | Wilcoxon test              |                            | P=0.2166           |
