# Supplementary material for: State-dependent reward circuit modulation gates social buffering of stress
Source: Research Square preprint supplement (doi:10.21203/rs.3.rs-9441690/v1), 2026-05-21
Supplement: Supplementary file 2 [file e7db945e09ed0aaaaac1ba49.pdf]

| Fig.            | Figure experiment                                                                                                               | Number of animals per group (F-females, M-males) | Is data distribution normal? (Shapiro-Wilk test, alpha=0.05) | Analysis                                     | Analysis results (post-hoc results reported in figures)                                          | P value                                                  |
|-----------------|---------------------------------------------------------------------------------------------------------------------------------|--------------------------------------------------|--------------------------------------------------------------|----------------------------------------------|--------------------------------------------------------------------------------------------------|----------------------------------------------------------|
| <b>Figure 1</b> |                                                                                                                                 |                                                  |                                                              |                                              |                                                                                                  |                                                          |
| 1c              | Effects of social interaction (SI) with a familiar partner on stress-induced increase in latency to retrieve rewards.           | n=13-16<br>F=7-9<br>M=6-9                        | yes                                                          | 2-way ANOVA (stress x SI)                    | Interaction: $F(1, 54) = 6.257$                                                                  | <b>P=0.0154</b>                                          |
| 1d              | Effects of SI with a familiar partner on stress-induced decrease in anticipatory licks.                                         | n=13-16<br>F=7-9<br>M=6-9                        | no                                                           | Kruskall-Wallis                              | $H(4,58)=15.67$                                                                                  | <b>P=0.0013</b>                                          |
| 1e              | Effects of SI with a familiar partner on postconsumption licks.                                                                 | n=13-16<br>F=7-9<br>M=6-9                        | yes                                                          | 2-way ANOVA (stress x SI)                    | Interaction: $F(1, 54) = 0.03647$<br>SI: $F(1, 54) = 3.339$<br>stress: $F(1, 54) = 0.04718$      | P=0.8493<br>P=0.0732<br>P=0.8289                         |
| 1g              | Effects of interaction with a familiar object on stress-induced increase in latency to retrieve rewards.                        | n=15<br>F=6<br>M=9                               | yes                                                          | Mixed-effects model (REML)                   | $F(1.625, 22.76) = 4.635$                                                                        | <b>P=0.0264</b>                                          |
|                 |                                                                                                                                 |                                                  |                                                              | One sample t-test vs baseline                | control obj: $t=1.951, df=14$<br>restraint: $t=3.964, df=14$<br>restraint obj: $t=3.137, df=14$  | P=0.0713<br><b>P=0.0014</b><br><b>P=0.0073</b>           |
| 1h              | Effects of interaction with an unknown partner on stress-induced increase in latency to retrieve rewards.                       | n=13<br>F=6<br>M=7                               | yes                                                          | Mixed-effects model (REML)                   | $F(1.870, 22.44) = 3.372$                                                                        | P=0.0552                                                 |
|                 |                                                                                                                                 |                                                  |                                                              | One sample t-test vs baseline                | control SI: $t=1.696, df=12$<br>restraint: $t=3.964, df=12$<br>restraint SI: $t=3.110, df=12$    | P=0.1156<br><b>P=0.0019</b><br><b>P=0.0090</b>           |
| 1j              | Subject mouse social behaviors with familiar and novel partners under control and stress conditions.                            | n=13-16<br>F=7-9<br>M=6-9                        | yes                                                          | 2-way ANOVA (familiarity x stress)           | Interaction: $F(1, 51) = 1.242$<br>familiarity: $F(1, 51) = 1.638$<br>stress: $F(1, 51) = 25.23$ | P=0.2704<br>P=0.2064<br><b>P&lt;0.0001</b>               |
| 1k              | Partner mouse social behaviors with familiar and novel subjects under control and stress conditions.                            | n=13-16<br>F=7-9<br>M=6-9                        | yes                                                          | 2-way ANOVA (familiarity x stress)           | Interaction: $F(1, 51) = 2.549$<br>familiarity: $F(1, 51) = 3.737$<br>stress: $F(1, 51) = 17.85$ | P=0.1165<br>P=0.0588<br><b>P&lt;0.0001</b>               |
| 1l              | Neural network machine learning model predicting social buffering in familiar mice.                                             | n=16<br>F=8<br>M=8                               | n/a                                                          | leave-one-mouse-out model validation         | $R^2 = 0.668$<br>RMSE = 26.771<br>MAE = 20.267<br>Pearson $r = 0.817$                            | <b>P&lt;0.0001</b>                                       |
|                 | Neural network machine learning model predicting social buffering on shuffled data                                              | n=16<br>F=8<br>M=8                               | n/a                                                          | leave-one-mouse-out model validation         | $R^2 = 0.064$<br>RMSE = 62.939<br>MAE = 52.918<br>Pearson $r = -0.253$                           | P=0.3441                                                 |
| 1m              | Random forest machine learning model                                                                                            | n=16<br>F=8<br>M=8                               | n/a                                                          | random forest training                       | $R^2 = 0.918$<br>RMSE = 20.776<br>MAE = 16.410<br>Pearson $r = 0.958$                            | <b>P&lt;0.0001</b>                                       |
| <b>Figure 2</b> |                                                                                                                                 |                                                  |                                                              |                                              |                                                                                                  |                                                          |
| 2c              | Effects of interaction with a familiar partner on stress-induced increase in latency to retrieve rewards -fiber photometry mice | n=16<br>F=8<br>M=8                               | control SI: yes<br>restraint: yes<br>restraint SI: no        | Mixed-effects model (REML)                   | $F(1.739, 25.21) = 6.294$                                                                        | <b>P=0.0080</b>                                          |
|                 |                                                                                                                                 |                                                  |                                                              | One sample t-test vs baseline/ Wilcoxon test | control SI: $t=2.199, df=15$<br>restraint: $t=5.603, df=14$<br>restraint SI: Wilcoxon test       | <b>P=0.0440</b><br><b>P&lt;0.0001</b><br><b>P=0.0290</b> |
| 2d              | Linear regression between body sniffing behavior in stressed subjects interacting with familiar unstressed partners.            | n=16<br>F=8<br>M=8                               | n/a                                                          | Linear regression                            | R square = 0.3780<br>Slope: $F(1, 14) = 8.506$                                                   | <b>P=0.0113</b>                                          |
| 2e              | Area under curve (AUC) during body sniffing of a familiar partner- average per mouse in DA cells                                | n=7<br>F=3<br>M=4                                | yes                                                          | Paired t-test                                | $t=0.8932, df=6$                                                                                 | P=0.4062                                                 |
| 2f              | AUC during body sniffing of a familiar partner- average per mouse in GABA cells                                                 | n=9<br>F=5<br>M=4                                | no                                                           | Wilcoxon test                                |                                                                                                  | <b>P=0.0078</b>                                          |

|                 |                                                                                                              |                    |                                                        |                                                 |                                                                                            |                                                |
|-----------------|--------------------------------------------------------------------------------------------------------------|--------------------|--------------------------------------------------------|-------------------------------------------------|--------------------------------------------------------------------------------------------|------------------------------------------------|
| 2g              | AUC during body sniffing of a novel partner-average per mouse in DA cells                                    | n=6<br>F=3<br>M=3  | yes                                                    | Paired t-test                                   | t=1.938, df=5                                                                              | P=0.1104                                       |
| 2h              | AUC during body sniffing of a novel partner-average per mouse in GABA cells                                  | n=6<br>F=3<br>M=3  | yes                                                    | Paired t-test                                   | t=0.8644, df=5                                                                             | P=0.4269                                       |
| <b>Figure 3</b> |                                                                                                              |                    |                                                        |                                                 |                                                                                            |                                                |
| 3b              | Effects of 10 min post-stress VTA DA activation on stress-induced increase in latency to retrieve rewards.   | n=14<br>F=6<br>M=8 | control ON:yes<br>restraint OFF:yes<br>restraint ON:no | Mixed-effects model (REML)                      | F (1.482, 17.78) = 3.395                                                                   | P=0.0682                                       |
|                 |                                                                                                              |                    |                                                        | One sample t-test vs baseline/<br>Wilcoxon test | control ON: t=2.019, df=12<br>restraint OFF: t=3.334, df=13<br>restraint ON: Wilcoxon test | P=0.0664<br><b>P=0.0054</b><br><b>P=0.0005</b> |
| 3d              | Effects of 10 min post-stress VTA GABA inhibition on stress-induced increase in latency to retrieve rewards. | n=14<br>F=4<br>M=9 | control ON:yes<br>restraint OFF:no<br>restraint ON:no  | Mixed-effects model (REML)                      | F (1.719, 21.49) = 11.49                                                                   | <b>P=0.0006</b>                                |
|                 |                                                                                                              |                    |                                                        | One sample t-test vs baseline/<br>Wilcoxon test | control ON:t=0.8547, df=12<br>restraint OFF: Wilcoxon test<br>restraint ON: Wilcoxon test  | P=0.4095<br><b>P=0.0002</b><br><b>P=0.0002</b> |
| 3h              | Effect of closed-loop VTA GABA inhibition on stress-induced latency to retrieve rewards                      | n=14<br>F=6<br>M=8 | no                                                     | Wilcoxon test                                   |                                                                                            | <b>P=0.0040</b>                                |
| 3j              | Effect of yoked VTA GABA inhibition on stress-induced latency to retrieve rewards                            | n=14<br>F=6<br>M=8 | no                                                     | Wilcoxon test                                   |                                                                                            | P=0.4631                                       |
